# Supplementary material for: Moderate Reduction in Nitrogen Fertilizer Results in Improved Rice Quality by Affecting Starch Properties without Causing Yield Loss
Source: MDPI journal article supplement (doi:10.3390/foods12132601), 2023-07-05
Supplement: s1 [file s1]

## Supplemental figures and tables

Table S1 The TPA parameters of cooked rice in different nitrogen application rates

| Year |           |           | Adhesiveness |              | springiness | gumminess     | chewiness  |
|------|-----------|-----------|--------------|--------------|-------------|---------------|------------|
|      | Cultivars | Treatment | (mJ)         | cohesiveness | (mm)        | (g)           | (mJ)       |
| 2020 | Bengal    | N0        | 0.15±0.01a   | 0.38±0.02a   | 0.65±0.04a  | 69.53±7.73b   | 0.46±0.04b |
|      |           | N1        | 0.12±0b      | 0.39±0.02a   | 0.65±0.05a  | 63.08±3.27b   | 0.38±0.03b |
|      |           | N2        | 0.14±0.01a   | 0.42±0.02a   | 0.70±0.04a  | 92.67±17.93a  | 0.63±0.10a |
|      | SD505     | N0        | 0.14±0.03a   | 0.42±0.02a   | 0.66±0.01a  | 79.20±5.03a   | 0.53±0.04a |
|      |           | N1        | 0.12±0.01a   | 0.42±0.02a   | 0.71±0.03a  | 85.81±6.80a   | 0.58±0.06a |
|      |           | N2        | 0.09±0b      | 0.40±0.02a   | 0.64±0.01a  | 85.21±14.34a  | 0.54±0.11a |
| 2021 | Bengal    | N0        | 0.16±0.02a   | 0.41±0.02a   | 0.62±0.02a  | 86.33±4.03a   | 0.53±0.04a |
|      |           | N1        | 0.11±0.02b   | 0.41±0.01a   | 0.64±0.02a  | 90.82±1.96a   | 0.58±0.02a |
|      |           | N2        | 0.10±0.01b   | 0.41±0.02a   | 0.63±0.02a  | 92.29±4.52a   | 0.58±0.05a |
|      | SD505     | N0        | 0.16±0.02a   | 0.47±0.02a   | 0.75±0.05a  | 104.5±5.63a   | 0.76±0.04a |
|      |           | N1        | 0.14±0.03ab  | 0.44±0.03a   | 0.75±0.08a  | 103.86±11.88a | 0.72±0.10a |
|      |           | N2        | 0.12±0b      | 0.46±0a      | 0.69±0.01a  | 112.31±4.56a  | 0.78±0.05a |

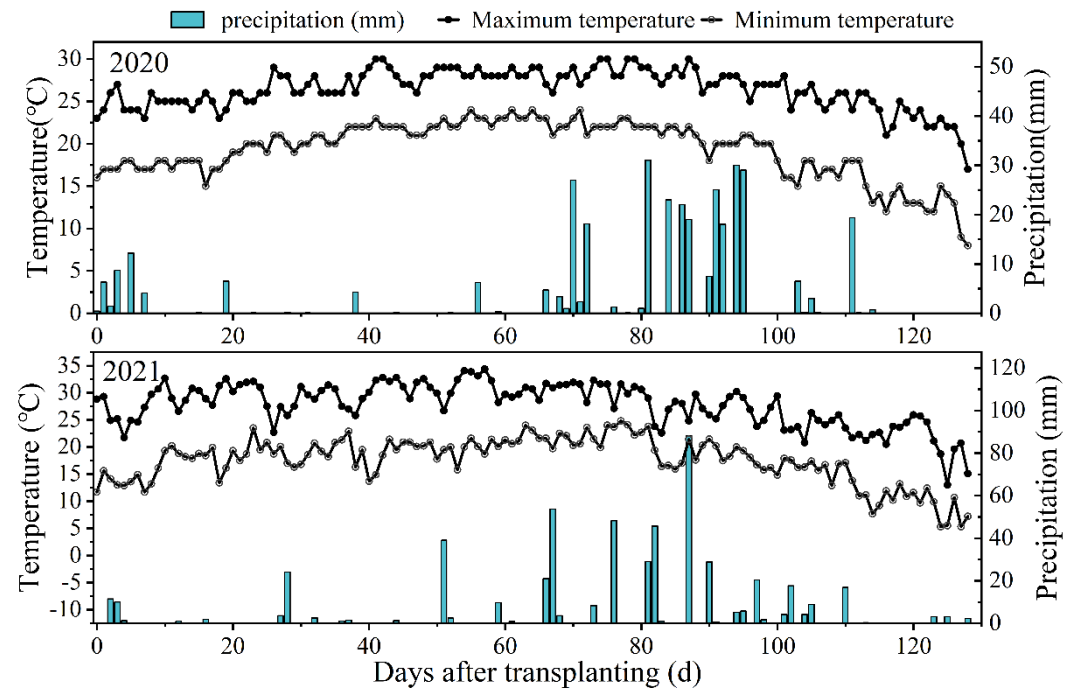

Figure S1 Temperature and precipitation in 2020 and 2021 during rice cultivation.

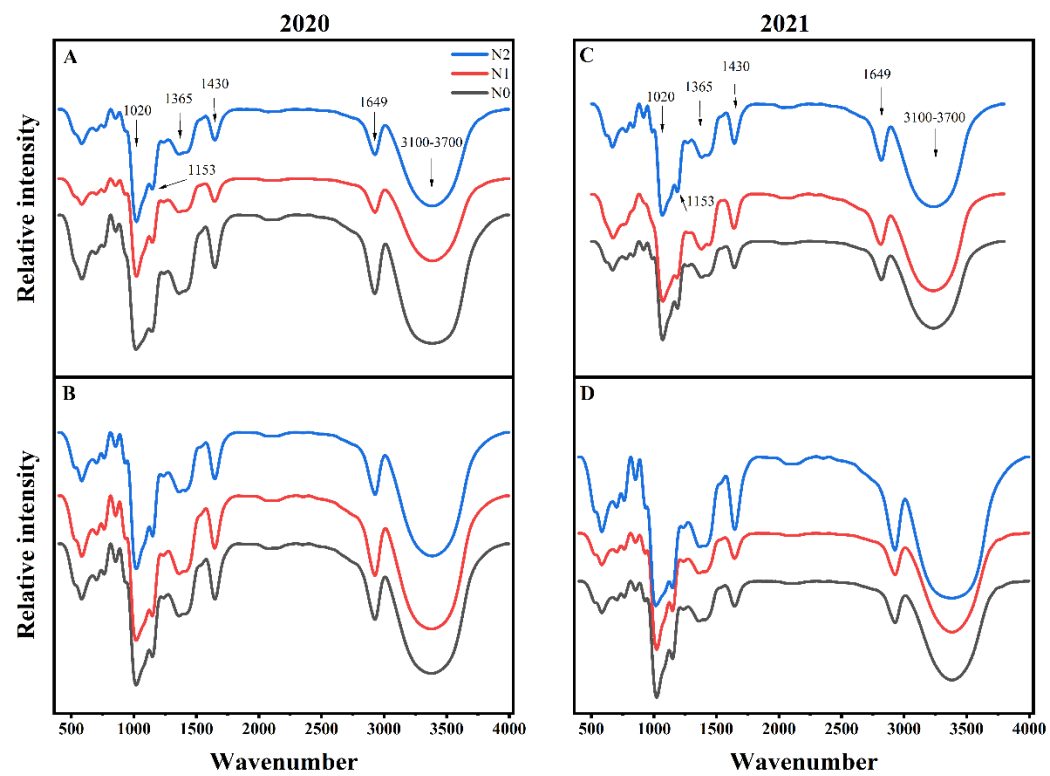

Figure S2 FTIR spectrum in different nitrogen rates from Bengal (A and C) and SD505 (B and D) in 2020 (A and B) and 2021 (C and D).

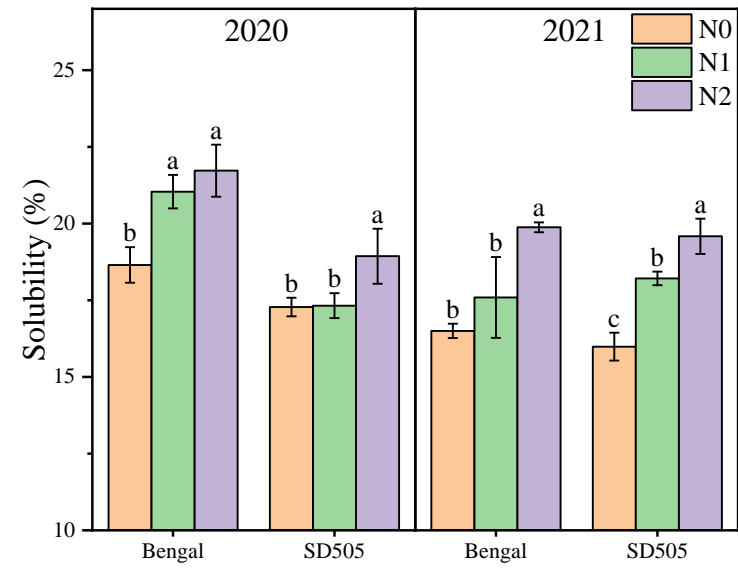

Figure S3 Solubility in different nitrogen rates from Bengal and SD505.
